# Supplementary material for: A two-step chemical vapor deposition process for the growth of continuous vertical heterostructure WSe2/h-BN and its optical properties
Source: Royal Society of Chemistry journal article supplement (doi:10.1039/d1ra02523f), 2021-01-01
Supplement: d1ra02523f1.pdf [file d1ra02523f1.pdf]

## Supporting information

### A two-step Chemical Vapor Deposition process for the growth of continuous vertical heterostructure WSe<sub>2</sub>/h-BN and its optical properties

M. Alahmadi,<sup>ab</sup> F. Mahvash,<sup>ac</sup> T. Szkopek<sup>c</sup> and M. Siaj<sup>a\*</sup>

<sup>a</sup> NanoQAM, Quebec Center for Functional Materials, Department of Chemistry, University of Quebec in Montreal, Succ CentreVille, CP8888, Montreal, Quebec H3C 3P8, Canada.

<sup>b</sup> Department of Chemistry, College of Science, Taibah University, Al-Madinah Al-Munawarah 41321, Saudi Arabia

<sup>c</sup> Department of Electrical and Computer Engineering, McGill University, Montréal, H3A 2A7, Quebec, Canada

E-mail: [siaj.mohamed@uqam.ca](mailto:siaj.mohamed@uqam.ca)

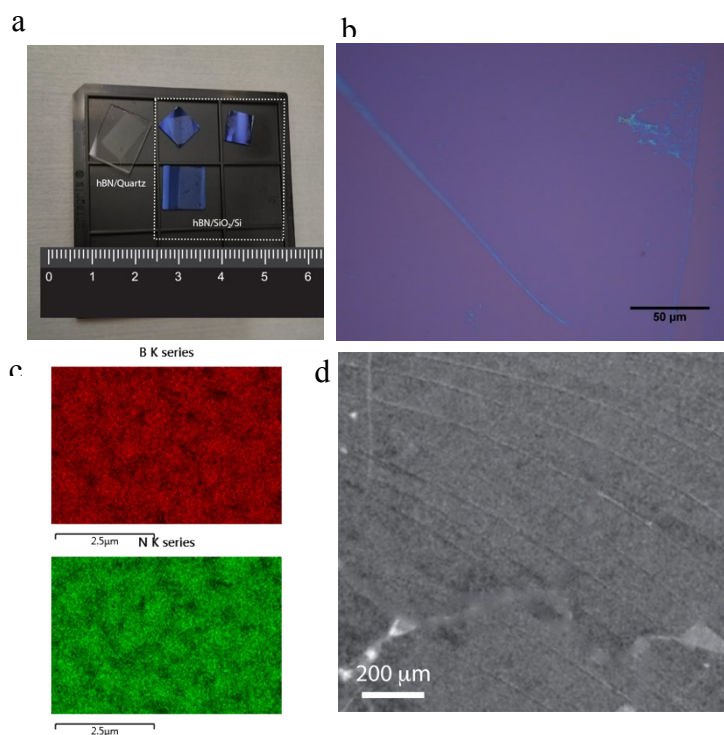

**Figure S1.** a) Large scale growth of hBN on quartz and SiO<sub>2</sub>. b) Optical images of hBN on top of SiO<sub>2</sub>/Si. c) energy dispersive X-ray (EDX) elemental mapping of Boron (B) and Nitrogen (N). d) SEM image of hBN on substrate.

**TEM and SAED data:**

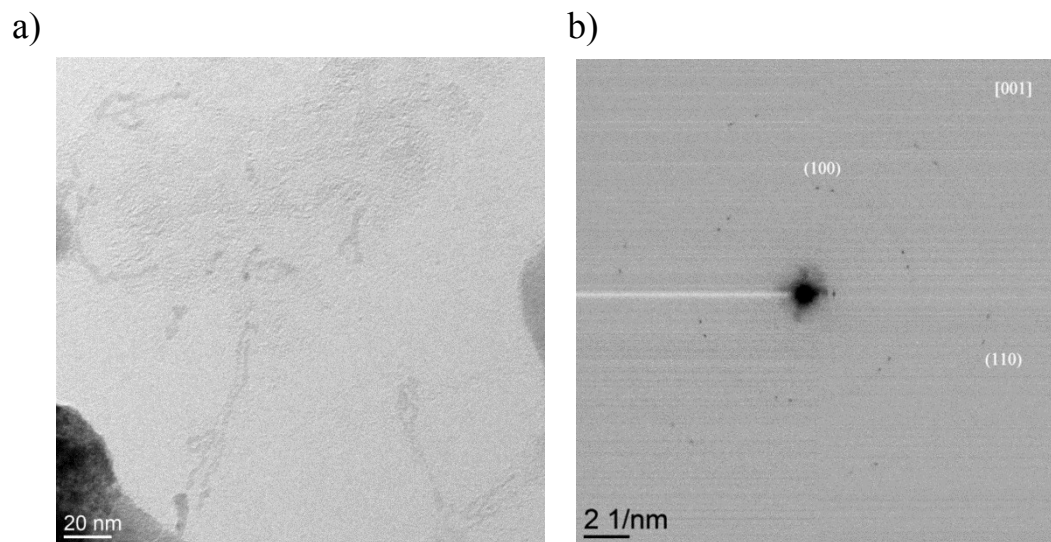

**Figure S2.** a) TEM image of a suspended hBN monolayer edge over Cu foil. b) The selected area electron diffraction (SAED) pattern with the expected hexagonal lattice structure of hBN monolayer.

**RAMAN mapping hBN/SiO<sub>2</sub>:**

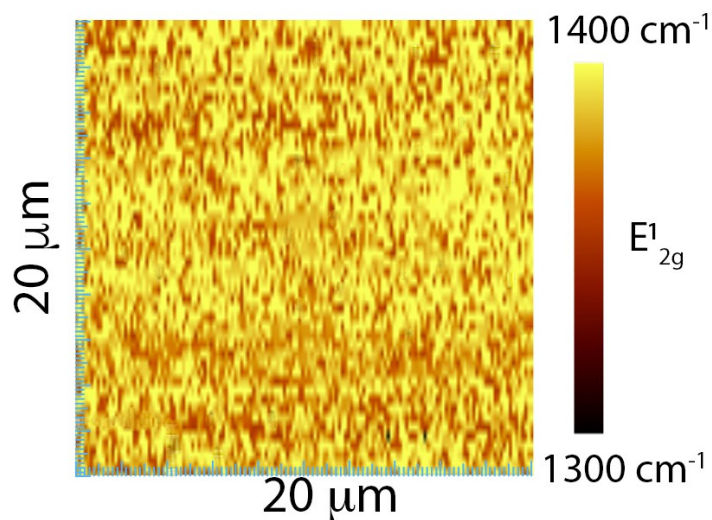

**Figure S3.** a) Peak intensity map of  $E'_{2g}$  ( $\sim 1369 \text{ cm}^{-1}$ ) Raman mode of hBN film grown on top of  $\text{SiO}_2/\text{Si}$  substrate.

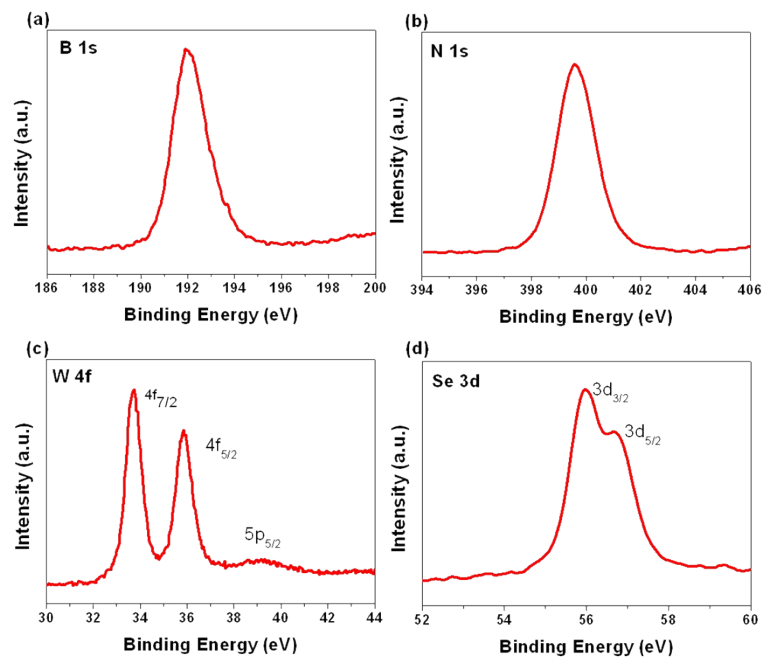

**Figure 4S:** XPS investigation of the WSe<sub>2</sub>/hBN heterostructure. The XPS spectroscopic analysis of the WSe<sub>2</sub>/hBN heterostructure shows (a) B 1s, (b) N 1s (c) W4f, and (d) Se 1s.
